# Supplementary material for: Chemical Evaluation of Electronic Cigarettes: Multicomponent Analysis of Liquid Refills and their Corresponding Aerosols
Source: Oxford University Press journal article supplement (doi:10.1093/jat/bkx054), 2017-06-23
Supplement: bkx054_Beauvaletal_Suppldata.doc [file bkx054_Beauvaletal_Suppldata.doc]

# Supplementary data

# Materials and methods, additional details

## Trace elements

Exhaustive list of trace elements analysed: aluminum (Al), arsenic (As), beryllium (Be), cadmium (Cd), cobalt (Co), chromium (Cr), copper (Cu), mercury (Hg), manganese (Mn), nickel (Ni), lead (Pb), antimony (Sb), thallium (Tl), vanadium (V) and zinc (Zn).

## Pesticides

Some pesticides were analysed with direct injection according the following protocol. An aliquot of 500 µL of e-liquid supplemented with 5 µL of ISTD solution and 1.5 mL of 1 M phosphate buffer at pH 7 was extracted twice with 2 mL of a mixture of acetonitrile-cyclohexane-ethyl acetate (1:1:1, v/v/v). After evaporation to dryness of the organic phase, the residue was resuspended in 200 µL of ethyl acetate and transferred into a 200 µL glass insert. The sample was dried again and the wet residue was removed by adding a supplemental liquid-liquid extraction with n-hexane (100 µL). After vortex agitation, the organic layer was collected and dried under nitrogen flow. The final residue was reconstituted in 20 µL ethyl acetate for direct liquid injection analysis. Concerning the preparation of methanolic extracts, no liquid-liquid extraction was necessary and the procedure was as follows: a volume of 500 µL of sample supplemented with 5 µL of ISTD solution was evaporated to dryness, resuspended in 200 µL of ethyl acetate, transferred in a glass insert, dried again and reconstituted with 20 µL of ethyl acetate for liquid injection into gaz chromatograph system.

Exhaustive list of pesticides analysed: aldrin, chlorpyrifos ethyl, chlorpyrifos methyl, cis-chlordane, cyhalothrin, cypermethrin, deltamethrin, diazinon, dieldrin, diflufenican, endrin, fenvalerate, fipronil, fipronil sulfone, heptachlor, heptachlor-endo-epoxide, heptachlor-exo-epoxide, hexachlorobenzene (HCB), isodrin, malathion, o,p'-dichlorodiphenyldichloroethane (o,p'-DDD), o,p'-dichlorodiphenyldichloroethylene (o,p'-DDE), o,p'-dichlorodiphenyltrichloroethane (o,p'-DDT), oxadiazon, oxy-chlordane, p,p'-dichlorodiphenyldichloroethane (p,p'-DDD), p,p'-dichlorodiphenyldichloroethylene (p,p'-DDE), p,p'-dichlorodiphenyltrichloroethane (p,p'-DDT), parathion ethyl, parathion methyl, permethrin, polybromodiphenylether 47 (BDE 47), polybromodiphenylether 99 (BDE 99), polybromodiphenylether 100 (BDE 100), polybromodiphenylether 153 (BDE 153), polybromodiphenylether 154 (BDE 154), polychlorobiphenyle 101 (PCP 101), polychlorobiphenyle 138 (PCP 138), polychlorobiphenyle 153 (PCP 153), polychlorobiphenyle 180 (PCP 180), propiconazole, trans-chlordane, trifluralin, α-endosulfan, α-hexachlorocyclohexane (α-HCH), β-endosulfan, β-hexachlorocyclohexane (β-HCH), γ-hexachlorocyclohexane (γ-HCH), δ-hexachlorocyclohexane (δ-HCH), ε-hexachlorocyclohexane (ε-HCH).

Limits of quantification are presented in Table S1.

## PAHs

Exhaustive list of PAH analysed: naphthalene, acenaphtylene, acenaphthene, fluorine, phenanthrene, anthracene, fluoranthene, pyrene, benz[a]anthracene, chrysene, benzo[b]fluoranthene, benzo[k]fluoranthene, benzo[a]pyrene, indeno[1,2,3-cd]pyrene, dibenz[a,h]anthracene, benzo[g,h,i]perylene.

## Experimental blanks

Experimental blank concentrations were evaluated for each experiment using the same protocols as for e-vapors without any e-cig connected to the smoking machine inlet (Table S2). E-vapor and/or smoke concentrations which were comparable to blank concentrations, were considered as probable contamination from collecting or storage materials.

Table S1 Limits of quantification of pesticides in e-vapor and 3R4F smoke (expressed as pg/mL puff)

| **Pesticides** | **LOQ (e-vapor)** | **LOQ (3R4F)** |
| --- | --- | --- |
| α-HCH | 0.09 | 0.30 |
| β-HCH | 0.95 | 2.98 |
| γ-HCH | 0.09 | 0.30 |
| δ-HCH | 0.95 | 2.98 |
| ε-HCH | 0.95 | 2.98 |
| o,p'-DDE | 0.95 | 2.98 |
| p,p'-DDE | 0.95 | 2.98 |
| o,p'-DDD | 0.95 | 2.98 |
| p,p'-DDD | 0.95 | 2.98 |
| o,p'-DDT | 0.95 | 2.98 |
| p,p'-DDT | 0.95 | 2.98 |
| Aldrin | 0.19 | 0.60 |
| Isodrin | 0.95 | 2.98 |
| Dieldrin | 0.95 | 2.98 |
| Endrin | 0.95 | 2.98 |
| α-endosulfan | 0.09 | 0.30 |
| β-endosulfan | 0.19 | 0.60 |
| Heptachlor | 0.19 | 0.60 |
| Heptachlor-exo-epoxide | 0.19 | 0.60 |
| Heptachlor-endo-epoxide | 0.19 | 0.60 |
| trans-chlordane | 0.09 | 0.30 |
| cis-chlordane | 0.09 | 0.30 |
| oxy-chlordane | 0.09 | 0.30 |
| HCB | 0.09 | 0.30 |
| Diazinon | 1.89 | 5.95 |
| Chlorpyriphos methyl | 3.79 | 11.90 |
| Chlorpyriphos ethyl | 0.09 | 0.30 |
| Parathion methyl | 0.19 | 0.60 |
| Parathion ethyl | 0.09 | 0.30 |
| Malathion | 1.89 | 5.95 |
| Cyhalothrine | 0.09 | 0.30 |
| Permethrine | 4.73 | 14.88 |
| Cypermethrine | 0.38 | 1.19 |
| Fenvalerate | 0.28 | 0.89 |
| Deltamethrine | 3.79 | 11.90 |
| PCB101 | 1.89 | 5.95 |
| PCB 153 | 0.09 | 0.30 |
| PCB 138 | 0.19 | 0.60 |
| PCB 180 | 0.09 | 0.30 |
| Propiconazole | 3.79 | 11.90 |
| BDE 47 | 1.89 | 5.95 |
| BDE 100 | 0.95 | 2.98 |
| BDE 99 | 0.95 | 2.98 |
| BDE 154 | 0.95 | 2.98 |
| BDE 153 | 1.89 | 5.95 |
| Trifluraline | 0.09 | 0.30 |
| Oxadiazon | 0.95 | 2.98 |
| Fipronil | 0.95 | 2.98 |
| Fipronil sulfone | 0.95 | 2.98 |
| Diflufenican | 1.89 | 5.95 |

Table S2 Experimental blank concentrations

|  | **Compounds** | ***LOQ***  ***(per mL puff)*** | **Experimental blank**  ***(per mL puff)*** | ***LOQ***  ***(per puff)*** | **Experimental blank**  **(per puff)** |
| --- | --- | --- | --- | --- | --- |
| **Constituents (µg)** | Nicotine | *0.0038* | ~ | *0.208* | ~ |
| Propylene glycol | *3.0* | ~ | *163* | ~ |
| Glycerol | *2.4* | ~ | *130* | ~ |
| Ethylene glycol | *5.9* | ~ | *326* | ~ |
| **Trace elements**  **(pg)** | Antimony (Sb) | *0.11* | ~ | *6.25* | ~ |
| Arsenic (As) | *0.23* | ~ | *12.5* | ~ |
| Cadmium (Cd) | *0.02* | ~ | *1.25* | ~ |
| Chromium (Cr) | *2.1* | ~ | *116* | ~ |
| Lead (Pb) | *0.23* | 1.7 ± 1.6a | *12.5* | 93.9 ± 85.3 |
| Thallium (Tl) | *0.06* | ~ | *3.1* | ~ |
| **Pesticides**  **(pg)** | Chlorpyrifos ethyl | *0.09* | ~ | *5.21* | ~ |
| Cyhalothrin | *0.09* | ~ | *5.21* | ~ |
| Cypermethrin | *0.38* | ~ | *20.8* | ~ |
| Trifluralin | *0.09* | ~ | *5.21* | ~ |
| α-endosulfan | *0.09* | ~ | *5.21* | ~ |
| β-endosulfan | *0.19* | ~ | *10.4* | ~ |
| **PAHs**  **(pg)** | Acenaphthene | *0.09* | ~ | *5.21* | ~ |
| Acenaphthylene | *0.09* | ~ | *5.21* | ~ |
| Anthracene | *0.09* | ~ | *5.21* | ~ |
| Benz[a]anthracene | *0.09* | ~ | *5.21* | ~ |
| Benzo[a]pyrene | *0.09* | ~ | *5.21* | ~ |
| Benzo[b]fluoranthene | *0.09* | ~ | *5.21* | ~ |
| Benzo[g,h,i]perylene | *0.09* | ~ | *5.21* | ~ |
| Benzo[k]fluoranthene | *0.09* | ~ | *5.21* | ~ |
| Chrysene | *0.09* | ~ | *5.21* | ~ |
| Dibenz[a,h]anthracene | *0.19* | ~ | *10.4* | ~ |
| Fluoranthene | *0.19* | ~ | *10.4* | ~ |
| Fluorene | *0.09* | 0.2 | *5.21* | 10.7 |
| Indeno[1,2,3-cd]pyrene | *0.19* | ~ | *10.4* | ~ |
| Naphthalene | *0.47* | 1.1 | *26.0* | 61.3 |
| Phenanthrene | *0.19* | 0.6 | *10.4* | 35 |
| Pyrene | *0.19* | ~ | *10.4* | ~ |
| **Carbonyls**  **(ng)** | Acetaldehyde | *0.05* | ~ | *2.60* | ~ |
| Acrolein | *0.05* | ~ | *2.60* | ~ |
| Formaldehyde | *0.05* | ~ | *2.60* | ~ |

*Experimental blank concentrations were evaluated using the same protocols as for e-vapors without any e-cig connected to the smoking machine inlet. “~“: < Limit of quantification, a Results are presented as mean +/- standard deviation of triplicate experiments.*

Table S3 Analytical method parameters

|  | Nicotine  in e-liquid  (GC-FID) | Nicotine  in extracts  (UPLC-MS/MS) | Propylene glycol  (GC-MS/MS) | Ethylene glycol  (GC-MS/MS) | Glycerol  (GC-MS/MS) |
| --- | --- | --- | --- | --- | --- |
| Linearity | 0.5 - 40 mg/mL | 10 - 2000 ng/mL | 31.25 - 5000 µg/mL | 62.5 - 5000 µg/mL | 12.5 - 100 µg/mL |
| LOD  *(n=10)* | *No signal from blank* | 0.45 ng/mL | 0.9 µg/mL | 5.1 µg/mL | 0.3 µg/mL |
| LLOQ  *(n=6)* | 0.5 mg/mL  (CV 0.9 %) | 10 ng/mL | 31.25 µg/mL  (CV 5.1 %) | 62.5 µg/mL  (CV 0.9 %) | 12.5 µg/mL  (CV 4.9 %) |
| Repeatability  *(n=6)* | 3.2 % | 2.1 % | 8.2 % | 7.1 % | 7.5 % |
| Intermediate precision  *(n=6)* | 0.7 % | 3.0 % | 2.6 % | 8.4 % | 4.7 % |
| Accuracy  *(n=6)* | 96.6 % | 100.4 % | 99.4 % | 94.0 % | 91.7 % |

*“LOD“: limit of detection; “LLOQ”: lower limit of quantification*

Table S3 (continued) Analytical method parameters

|  | Trace elements  in e-liquid  (ICP-MS) | Trace elements  in extracts  (ICP-MS) | Carbonyls  in extracts  (HPLC-DAD)a |
| --- | --- | --- | --- |
| Linearity | 0.005 – 1.392 to  1 – 1500 ng/mL | 0.002 – 1.392 to  1 – 1500 ng/mL | 50 – 3000 ng/mL |
| LOD  (n=10) | Assimilated to LLOQ | Assimilated to LLOQ | 17 ng/mL |
| LLOQ  (n=6) | 0.005 – 10 ng/mL | 0.002 – 5 ng/mL | 50 ng/mL |
| Repeatability  (n=6) | 2.1 – 9.4 % | 1.6 – 7.7 % | 0.2 % |
| Intermediate precision  (n=6) | 4.0 – 14.3 % | 0.9 – 10.2 % | 0.5 % |
| Accuracy  (n=6) | 90.6 – 111.3 % | 95.0 – 109.8 % | 100.4 – 103.4 % |

*“LOD“: limit of detection; “LLOQ”: lower limit of quantification. a Data are given for formaldehyde and acetaldehyde; acrolein was quantified with the same method, though validation data are not available.*

Table S4 Chemical analysis of e-cig/3R4F emissions related to one puff.

|  | **Compounds** | ***LOQ***  ***(e-vapors)*** | **F-/Nic-** | **F-/Nic+** | **BT/Nic-** | **BT/Nic+** | **CM/Nic-** | **CM/Nic+** | ***LOQ***  ***(smoke)*** | **3R4F** |
| --- | --- | --- | --- | --- | --- | --- | --- | --- | --- | --- |
| **Constituents (µg/puffa)** | Nicotine | *0.208* | ~ | 30.3 ± 1.8 | ~ | 30.8 ± 0.7 | ~ | 16.5 ± 2.0 | *0.416* | 36.1 ± 0.84 |
| Propylene glycol | *163* | 946 ± 149b | 1254 ± 22.0 | 1155 ± 22.0 | 1210 ± 16.5 | 886 ± 82.5 | 550 ± 77.0 | *326* | ~ |
| Glycerol | *130* | 677 ± 121 | 864 ± 27.5 | 671 ± 33.0 | 710 ± 16.5 | 567 ± 44.0 | 391 ± 60.5 | *260* | ~ |
| Ethylene glycol | *326* | ~ | ~ | ~ | ~ | ~ | ~ | *652* | ~ |
| **Trace elementsc**  **(pg/puff)** | Antimony (Sb) | *6.25* | 25.9 ± 16.5 | 15.4 ± 9.4 | 10.5 ± 5.0 | ~ | 7.7 ± 0.6 | ~ | *12.5* | ~ |
| Arsenic (As) | *12.5* | ~ | ~ | ~ | ~ | ~ | ~ | *25* | 147 ± 6.3 |
| Cadmium (Cd) | *1.25* | ~ | 2.2 ± 0.6 | ~ | ~ | 7.7 ± 2.8 | ~ | *2.5* | 1574 ± 66.5 |
| Chromium (Cr) | *116* | ~ | 185 ± 32.5 | 183 ± 26.4 | 158 ± 36.3 | ~ | ~ | *232* | ~ |
| Lead (Pb) | *12.5* | 64.6 ± 21.6 | 71.5 ± 46.4 | 86.7 ± 28.2 | 56.3 ± 8.5 | ~ | ~ | *25* | 578 ± 20.7 |
| Thallium (Tl) | *3.1* | ~ | ~ | ~ | ~ | ~ | ~ | *6.2* | 35.7 ± 4.9 |
| **Pesticidesc**  **(pg/puff)** | Chlorpyrifos ethyl | *5.21* | ~ | ~ | ~ | ~ | ~ | ~ | *10.4* | 31.5 |
| Cyhalothrin | *5.21* | ~ | ~ | ~ | ~ | ~ | ~ | *10.4* | 31.5 |
| Cypermethrin | *20.8* | ~ | ~ | ~ | ~ | ~ | ~ | *41.6* | 84.0 |
| Trifluralin | *5.21* | ~ | ~ | ~ | ~ | ~ | ~ | *10.4* | 256 |
| α-endosulfan | *5.21* | ~ | ~ | ~ | ~ | ~ | ~ | *10.4* | 77.0 |
| β-endosulfan | *10.4* | ~ | ~ | ~ | ~ | ~ | ~ | *20.8* | 305 |
| **PAHs**  **(pg/puff)** | Acenaphthene | *5.21* | ~ | ~ | ~ | ~ | ~ | ~ | *10.4* | 3227 |
| Acenaphthylene | *5.21* | 11.6 | 16.5 | 10.5 | 20.4 | 13.2 | 13.8 | *10.4* | 13440 |
| Anthracene | *5.21* | ~ | ~ | ~ | ~ | ~ | ~ | *10.4* | 3710 |
| Benz[a]anthracene | *5.21* | ~ | ~ | ~ | ~ | ~ | ~ | *10.4* | 791 |
| Benzo[a]pyrene | *5.21* | ~ | ~ | ~ | ~ | ~ | ~ | *10.4* | 609 |
| Benzo[b]fluoranthene | *5.21* | ~ | ~ | ~ | ~ | ~ | ~ | *10.4* | 347 |
| Benzo[g,h,i]perylene | *5.21* | ~ | ~ | ~ | ~ | ~ | ~ | *10.4* | 508 |
| Benzo[k]fluoranthene | *5.21* | ~ | ~ | ~ | ~ | ~ | ~ | *10.4* | 389 |
| Chrysene | *5.21* | ~ | ~ | ~ | ~ | ~ | ~ | *10.4* | 1155 |
| Dibenz[a,h]anthracene | *10.4* | ~ | ~ | ~ | ~ | ~ | ~ | *20.8* | 40.3 |
| Fluoranthene | *10.4* | ~ | ~ | ~ | ~ | ~ | ~ | *20.8* | 4095 |
| Fluorene | *5.21* | ~ | ~ | ~ | ~ | ~ | ~ | *10.4* | 12845 |
| Indeno[1,2,3-cd]pyrene | *10.4* | ~ | ~ | ~ | ~ | ~ | ~ | *20.8* | 263 |
| Naphthalene | *26.0* | 131 | 221 | 98.5 | 226 | 101 | 169 | *52.0* | 19635 |
| Phenanthrene | *10.4* | ~ | ~ | ~ | ~ | ~ | ~ | *20.8* | 10115 |
| Pyrene | *10.4* | ~ | ~ | ~ | ~ | ~ | ~ | *20.8* | 4025 |
| **Carbonyls**  **(ng/puff)** | Acetaldehyde | *2.60* | 24.2 ± 6.6 | 22.0 ± 5.5 | 8.8 ± 4.4 | 26.4 ± 18.2 | 41.8 ± 32.5 | 52.8 ± 13.8 |  | 53908d |
| Acrolein | *2.60* | ~ | 9.4 ± 2.8 | 116.1 ± 21.5 | 94.6 ± 22.6 | 6.1 ± 8.3 | ~ |  | 6000d |
| Formaldehyde | *2.60* | 52.3 ± 22.0 | 38.5 ± 5.0 | 20.4 ± 1.1 | 42.9 ± 26.4 | 71.0 ± 48.4 | 81.4 ± 17.6 |  | 2874d |

*“~“: < Limit of quantification, “F-“: unflavored e-liquid, “BT“: blond tobacco flavored e-liquid, “CM“: chlorophyll mint flavored e-liquid, “Nic-“: e-liquid without nicotine, “Nic+“: e-liquid with 16 mg/mL nicotine, “3R4F”: Kentucky 3R4F standard reference cigarettes (Lexington, Ky; https://ctrp.uky.edu/). a Results are presented in mass of analyte per 1 puff of 55 or 35 mL for e-vapors and 3R4F smoke, respectively. b Results are presented as mean +/- standard deviation of triplicate experiments, when available. c Are only presented compounds which were quantitated or higher than experimental blanks in at least one sample. d Extrapolated values from Eldridge et al.* (18)
